# Supplementary material
Source: PubMed Central journal article supplement (PMC7731776)

**BRAIN AVM RECURRENCE AFTER APPARENT MICROSURGICAL CURE:  
INCREASED RISK IN CHILDREN WHO PRESENT WITH AVM RUPTURE**

**SUPPLEMENTAL MATERIAL**

**Supplementary Table.** Characteristics of patients with AVM recurrence.

| Patient No. | Sex | Age at First Presentation (Years) | Initial Clinical Presentation | AVM Location                                 | Time to Recurrence (Months) <sup>†</sup> | Presentation at Recurrence | Location of Recurrence (relative to resection site) | Size of Recurrence (longest axis) | High risk features <sup>§</sup> | Venous drainage |
|-------------|-----|-----------------------------------|-------------------------------|----------------------------------------------|------------------------------------------|----------------------------|-----------------------------------------------------|-----------------------------------|---------------------------------|-----------------|
| 1           | M   | 15                                | ICH                           | Perimesencephalic<br>Left Parietal/Occipital | 65                                       | Asymptomatic               | anterior-inferior                                   | 0.4cm                             | -                               | Deep            |
| 2           | M   | 12                                | ICH                           | Left Temporal Lobe                           | 56                                       | Asymptomatic               | anterior-lateral                                    | 1.2cm                             | -                               | Superficial     |
| 3           | M   | 5                                 | ICH                           | Left Caudate Basal Forebrain                 | 4                                        | Asymptomatic               | anterior-inferior                                   | 1.5cm                             | Venous varix                    | Deep            |
| 4           | F   | 21                                | ICH                           | Left Frontal Lobe<br>Basal Ganglia<br>Insula | 45                                       | ICH                        | anterior-inferior                                   | 1.4cm                             | -                               | Deep            |
| 5           | M   | 23                                | ICH                           | Left Medial Temporal Lobe                    | 71                                       | Headache                   | deep/medial                                         | 1.5cm                             | Venous stenosis                 | Superficial     |
| 6           | M   | 11                                | ICH                           | Left Cerebellum                              | 61                                       | Asymptomatic               | anterior-medial                                     | 1.5cm                             | -                               | Deep            |
| 7           | M   | 17                                | ICH                           | Left Frontal Lobe                            | 62                                       | Asymptomatic               | inferior-deep                                       | 1.4cm                             | -                               | Deep            |
| 8           | M   | 21                                | ICH                           | Left Frontal Lobe                            | 104                                      | Asymptomatic <sup>‡</sup>  | superior-medial                                     | 1.2cm                             | -                               | Deep            |
| 9           | M   | 22                                | ICH                           | Right Medial Temporal Lobe                   | 80                                       | Headache                   | posterior-medial                                    | 1.3cm                             | -                               | Deep            |
| 10          | F   | 10                                | ICH                           | Left Temporal Lobe                           | 60                                       | Headache                   | lateral                                             | <0.5cm                            | -                               | Superficial     |
| 11          | F   | 14                                | Incidental <sup>*</sup>       | Right Temporal + Parietal                    | 20                                       | Seizure                    | inferior-deep                                       | 0.7cm                             | -                               | Superficial     |
| 12          | M   | 8                                 | Seizure/ICH                   | Left Posterior Temporal                      | 28                                       | Headache                   | inferior-deep                                       | 1.3                               | -                               | Superficial     |

<sup>\*</sup>Detected during workup of cerebral cavernous malformation with perilesional hemorrhage  
<sup>†</sup>Recurrence defined by angiographic confirmation of AVM following a previous negative diagnostic angiogram  
<sup>‡</sup>Screening performed routinely for hereditary hemorrhagic telangiectasia  
<sup>§</sup>Risk features including intranidal aneurysm, venous varix, venous stenosis

**Supplementary Figure I.** Eight year-old boy who initially presented 2 years prior (at 6 years of age) with intraparenchymal hemorrhage secondary to ruptured AVM which was subsequently surgically resected. (A) Unenhanced head CT at presentation demonstrates right posterior temporal hematoma with small amount of adjacent vasogenic edema. (B) Time-of-flight MRA reveals small tangle of vessels (black circle) in region of hematoma suggestive of underlying vascular malformation. (C&D) AP and later digital subtraction angiography (DSA) images at initial presentation demonstrate a right temporal lobe AVM with supply from inferior temporal branches of the right posterior cerebral artery (PCA). (E&F) Immediate post-operative AP and lateral DSA images demonstrate complete angiographic cure. (G) Two-year follow-up MRA demonstrates serpiginous flow related enhancement (black circle) in the posterior right temporal lobe suspicious for AVM recurrence. (H&I) DSA performed three weeks later confirms AVM recurrence (black circles) with supply from the posteroinferior temporal branch of the right PCA.

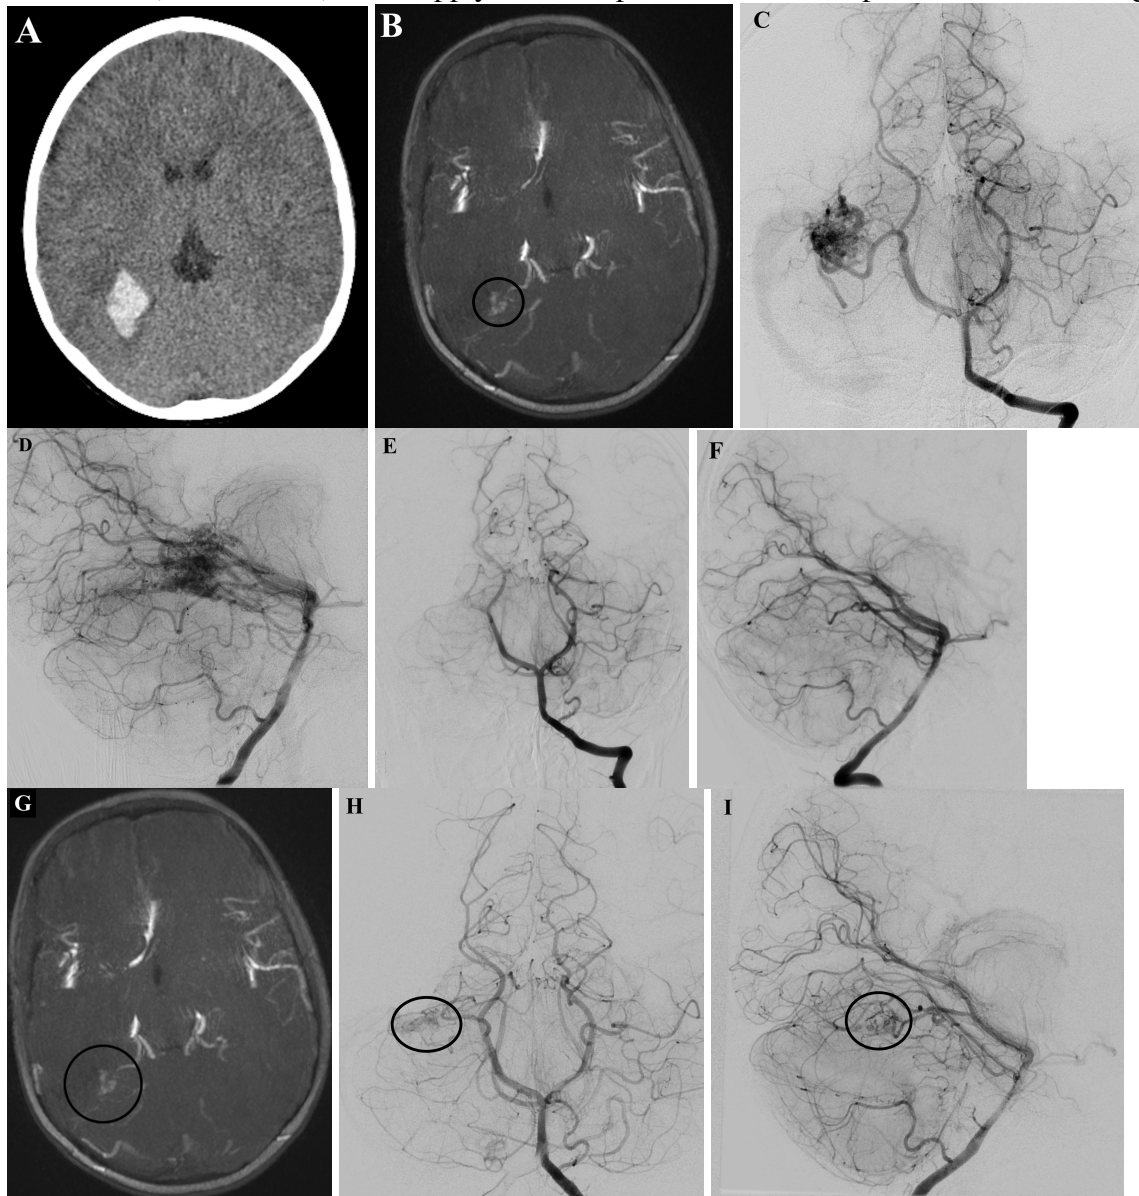

**Supplementary Figure II.** Six year-old boy who presented with headache and altered mental status. (A) Unenhanced head CT demonstrates a deep left cerebellar hemispheric hemorrhage with local mass effect and surrounding edema. (B, C) Lateral and AP right vertebral artery DSA images demonstrate a left cerebellar hemispheric AVM nidus with dominant arterial supply from ipsilateral superior cerebellar artery. Note there is no supply via the contralateral posterior inferior cerebellar artery (PICA). (D, E) Lateral and AP left vertebral artery DSA images demonstrate supply to the AVM via the ipsilateral PICA. (F) Post-operative left vertebral artery DSA image reveals no evidence of residual nidus or arteriovenous shunting. (G, H) Five-year follow up angiogram with AP and lateral left vertebral artery DSA images reveals recurrence of the deep left cerebellar hemispheric AVM with dominant supply via branches of enlarged right PICA (black arrows). Recall the right PICA was previously uninvolved.

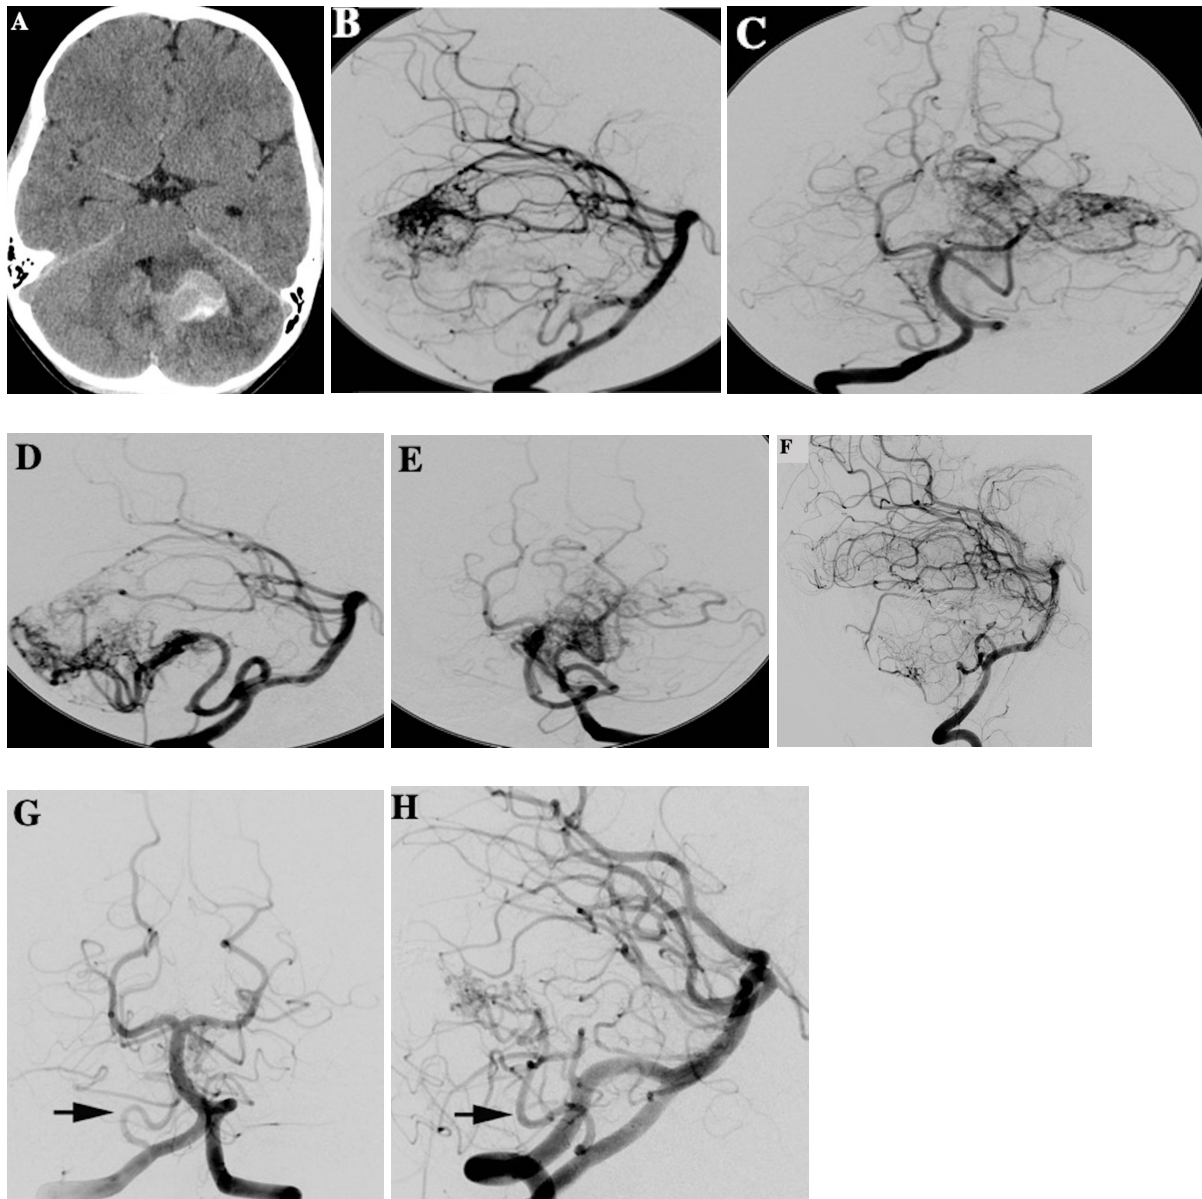

**Supplementary Figure III.** Eight year-old boy who presented with headache and episode of emesis. (A) Coronal T1-weighted image reveals heterogeneous T1 hyperintense signal in the anterior left temporal lobe in keeping with hematoma. (B) AP left internal carotid artery DSA image demonstrates AVM nidus (black oval) within the left temporal lobe with dominant supply from the anterior temporal artery. (C) Post-operative left internal carotid artery DSA image reveals no evidence of residual nidus (black arrow) or arteriovenous shunting. (D) Five-year follow up contrast-enhanced MRA demonstrates prominent collection of vessels within the anterior temporal pole adjacent to prior hemorrhage site. (E) AP left internal carotid artery DSA image reveals recurrence of AVM nidus (black oval) at the site of prior surgical resection supplied by anterior and mid-temporal arteries.

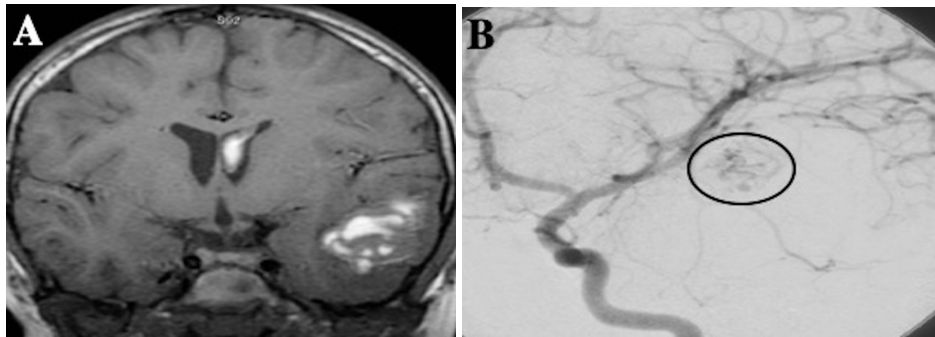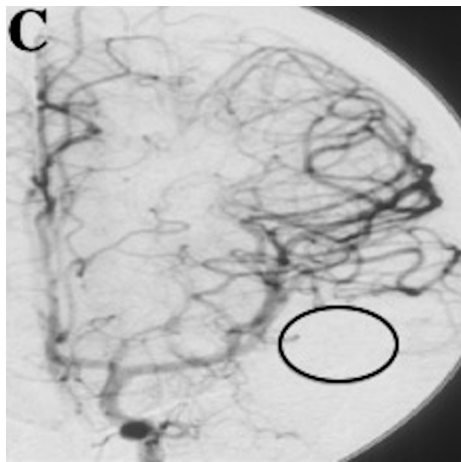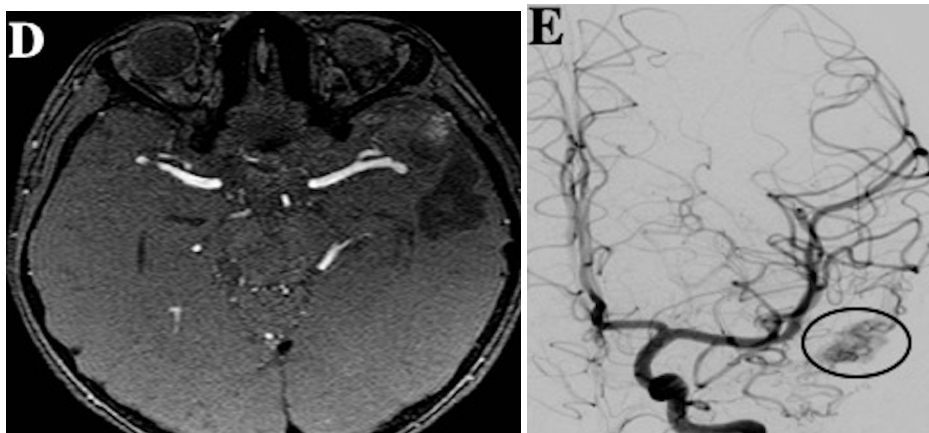

Supplement: NIHMS1621847-supplement-Supplemental_Material.pdf [file NIHMS1621847-supplement-Supplemental_Material.pdf]
